# Supplementary material for: Estimation of CO 2 fluxes in the cities of Zurich and Paris using the ICON-ART CTDAS inverse modelling framework
Source: Copernicus journal article supplement (doi:10.5194/egusphere-2025-3668), 2025-09-15
Supplement: Supplementary file 1 [file egusphere-2025-3668-supplement.pdf]

This supplementary document provides additional details and supporting information for the main text. The first section presents additional maps of emissions and land cover and figures of additional performance statistics and time series analyses. The second section presents additional tables describing the stations used in the inversions in Zurich and Paris as well as anthropogenic and biospheric flux estimates separately for summer and winter.

## 5 S1 Supplement

### S1.1 Figures

Figure S1 shows the annual mean anthropogenic CO<sub>2</sub> emissions over central Europe for 2021. The emission data are based on the TNO-GHGco inventory and are mapped onto the ICON-ART model grid at a spatial resolution of 6.6 km.

Figure S2 illustrates how well the ICON-ART model reproduces observed afternoon (11:00–16:00 UTC) CO<sub>2</sub> mole fractions at ICOS sites across Europe. The sites located within the model domain and used for these comparisons are listed in Table S2.

In order to better represent the vegetation cover in Zurich, we used a high-resolution (10 m) dataset developed within the ICOS cities project. The methodology for creating this dataset is described in Stagakis et al. (2025). Figure S3 demonstrates the results.

Figure S4 compares urban land use fraction estimates used as input to the ICON-ART model in Zurich and Paris. Panel (a) shows the custom high-resolution dataset for Zurich, while panels (b) and (c) show CORINE 2018 data. The comparison highlights significant differences in terms of the total urban area fractions and indicates an underestimation of vegetated areas by CORINE 2018.

In order to evaluate the model performance in terms of meteorology, we compared simulated wind speed and temperature at urban and non-urban sites in Zurich and Paris. Figure S5 shows the results for Zurich at two sites: zh hf (Kantonales Labor Zürich) and klof (Kloten Feld). The overall day-to-day patterns are reproduced well by the model for both temperature and wind speed. However, it tends to underestimate wind speed during nighttime and calm weather conditions.

Comparisons for two sites in Paris, CDS (Cité des Sciences) and SAC (Saclay), are present in Figure S6. Again, the model performs well, capturing the changes in temperature and wind speed. At CDS, it tends to overestimate wind speeds, likely due to the fact that buildings are not explicitly represented in the mesoscale model.

In Zurich, we had access to a larger number of meteorological observation sites, allowing for a more detailed evaluation of model performance. Figures S7 and S8 summarize the annual and monthly statistics of temperature and wind speed, respectively. The temperature bias is generally small and positive, around 0.21 K on average. Its largest values occur in summer 2023. The annual bias on most of the sites remains below 0.5 K, except for zhmi (Milchbuck Schule), which shows a larger value. Overall, the temperature is well reproduced by the model, with a high correlation of 0.92 compared to observations.

For wind speed, the bias was negative during the September–December 2022 period, becoming positive for the remainder of the simulations and averaging about 0.27 m s<sup>-1</sup>. Most sites show biases in the range of 0.5 and 1 m s<sup>-1</sup>, with zhmi (Milchbuck Schule) and zjho (Limmattalstrasse Höngg) showing larger differences. As expected, correlations for wind speed are lower, averaging around 0.64.

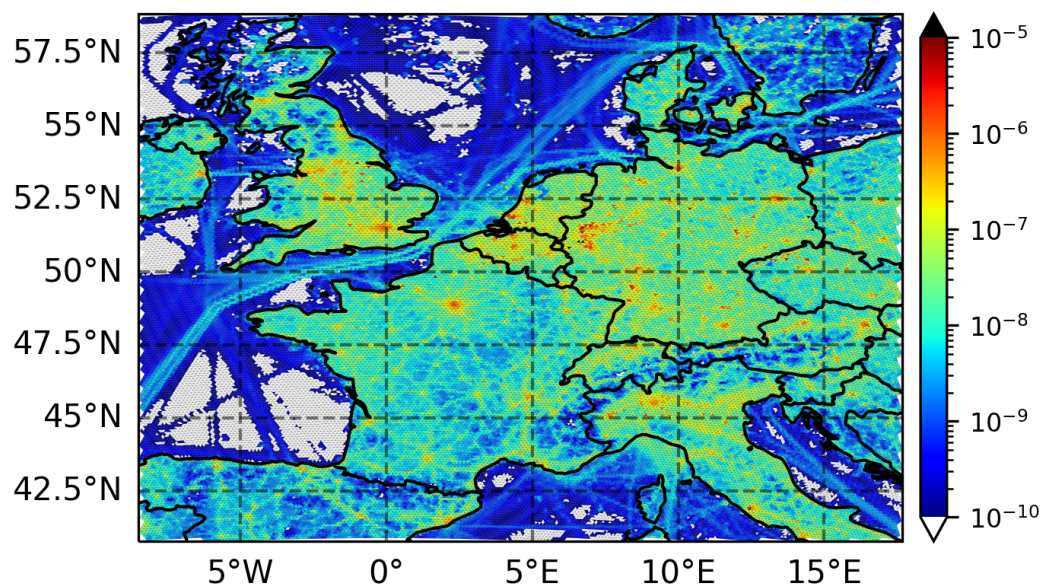

**Figure S1.** The annual mean anthropogenic CO<sub>2</sub> emissions from the TNO-GHGco inventory for the year 2021 shown on ICON-ART model grid within the domain over central Europe with 6.6 km spatial resolution. The inventory was based on the 2023 official reporting of 2021 emissions (AVENGERS project), except for shipping emissions. Those were taken from the 2021 version of the TNO-GHGco inventory used in the CoCO<sub>2</sub> project reflecting an earlier country reporting version for that sector.

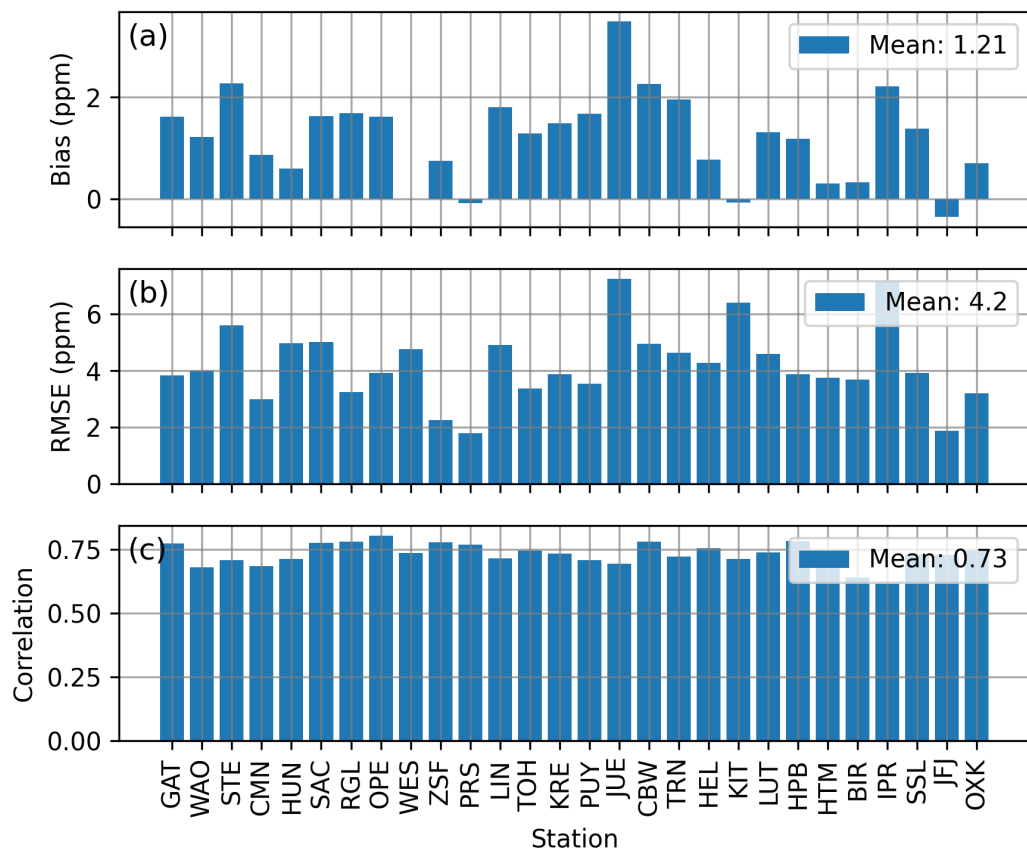

**Figure S2.** Annual statistics of mean modeled versus observed afternoon CO<sub>2</sub> mole fractions at ICOS stations in the European model domain. Panel (a) shows monthly mean biases for each site inside the model domain, (b) RMSEs, and (c) correlation coefficients.

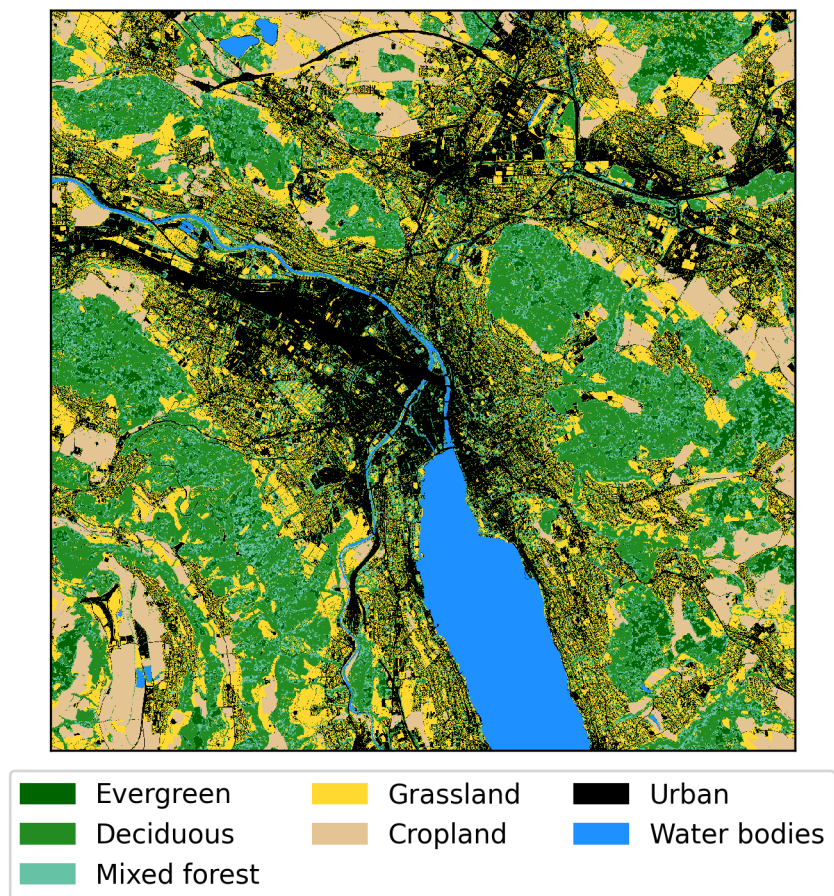

**Figure S3.** Landuse data in the city of Zurich at 10 m resolution (Stagakis et al., 2025).

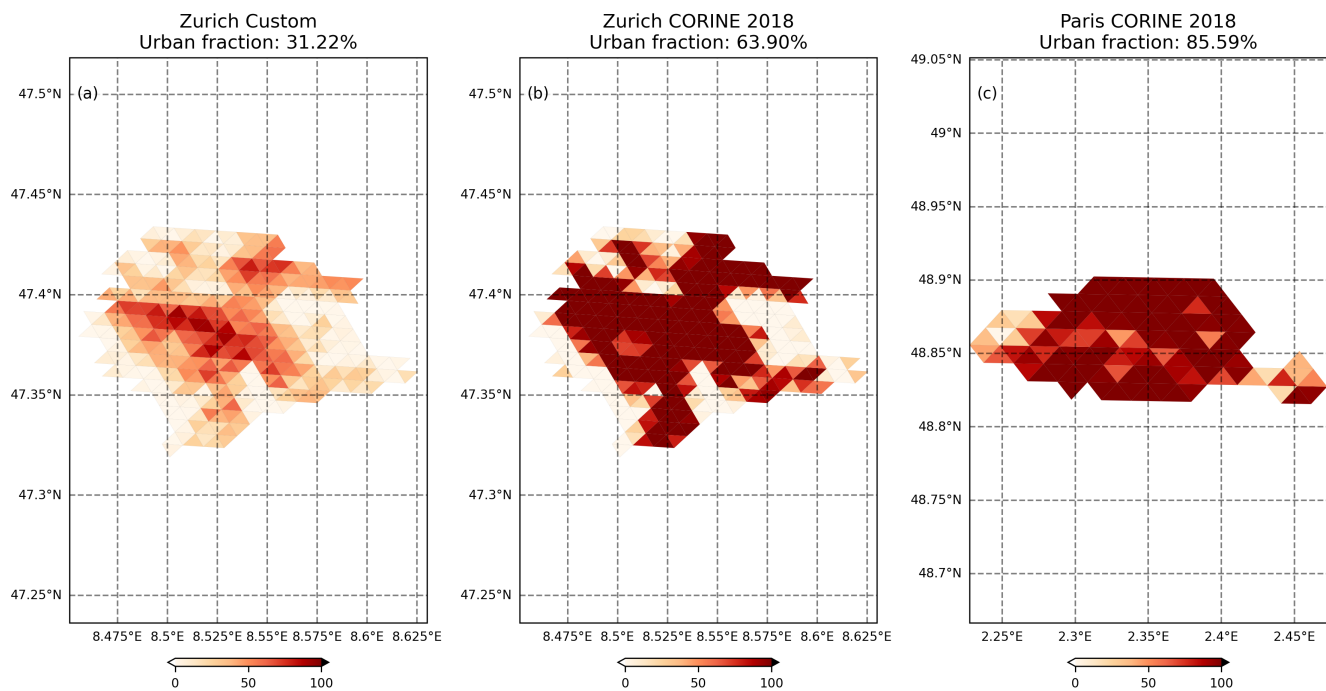

**Figure S4.** The urban land use fraction in Zurich and Paris, based on a custom made dataset (a) for Zurich and the CORINE 2018 (b), (c).

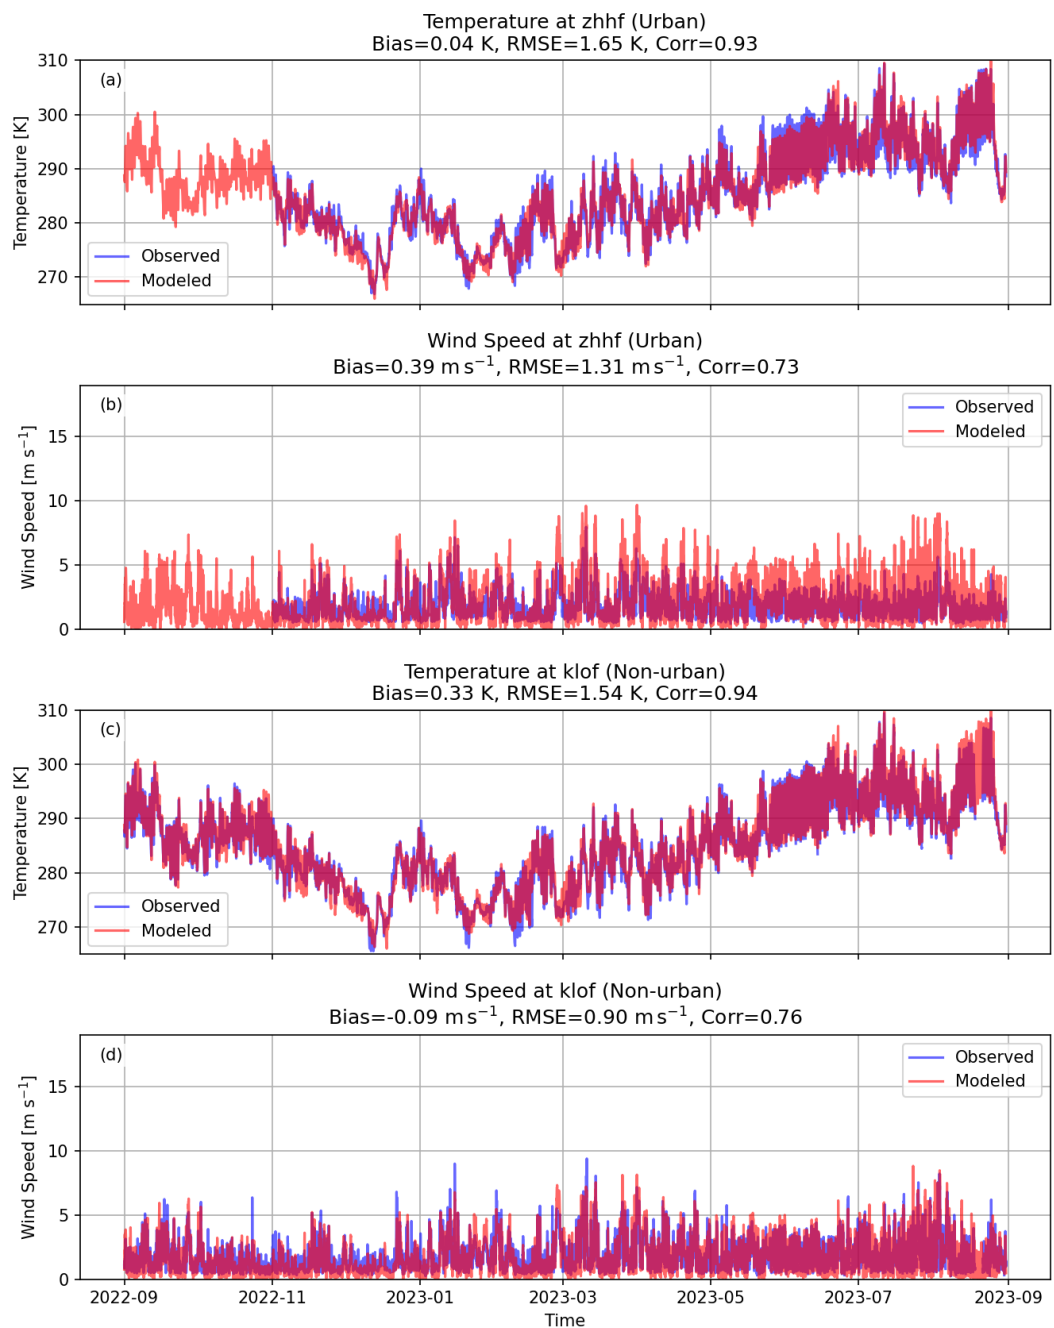

**Figure S5.** Wind speed and temperature comparison for an urban (a), (b) and non urban (c), (d) sites in Zurich.

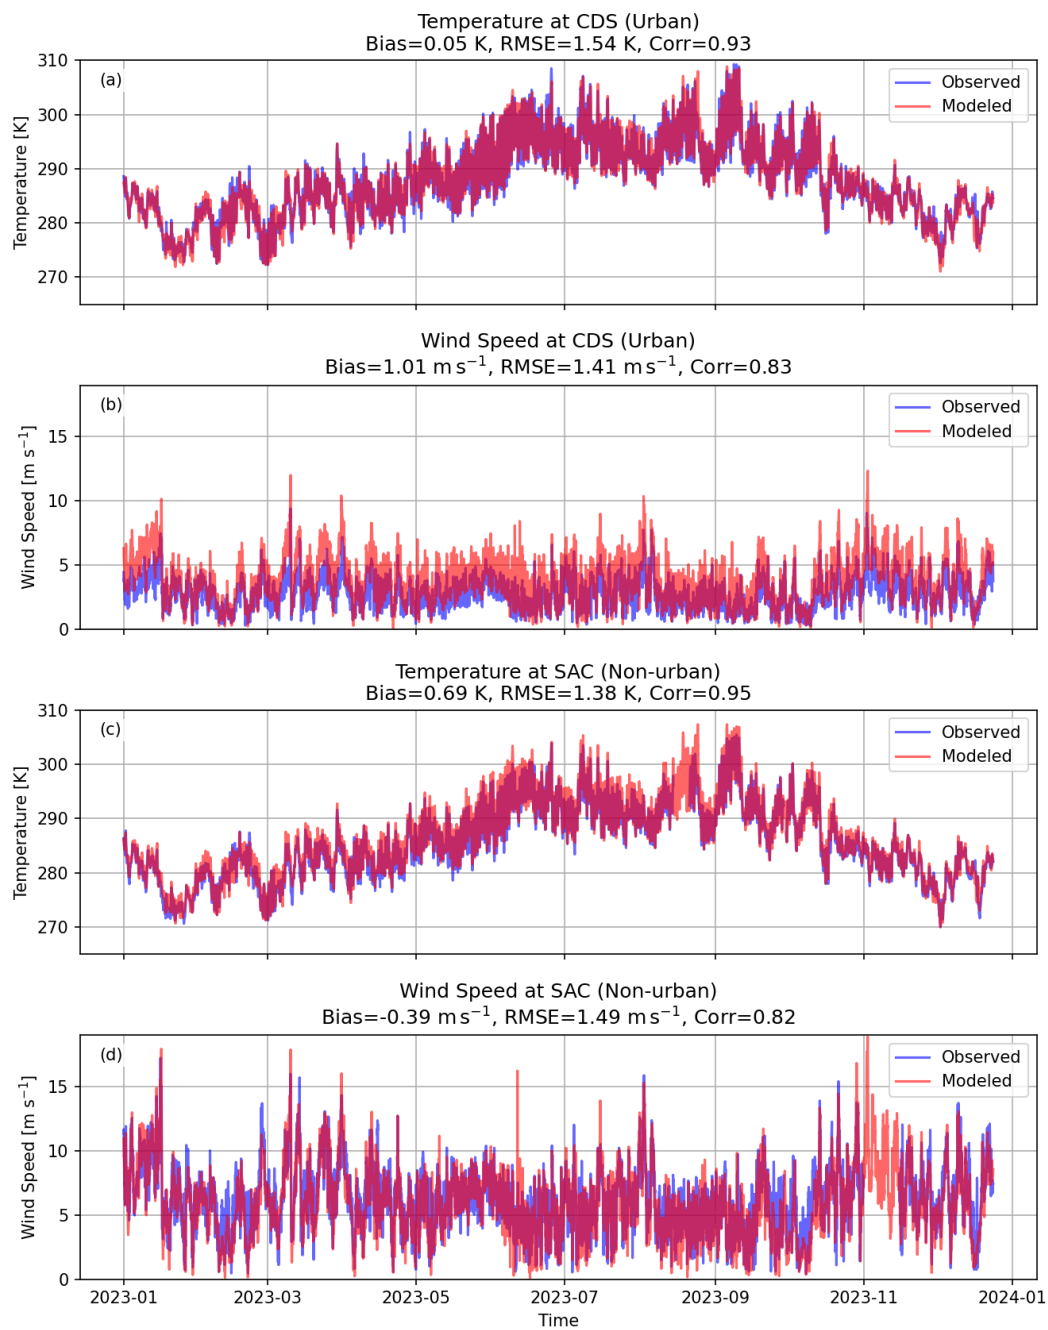

**Figure S6.** Wind speed and temperature comparison for an urban (a), (b) and non urban (c), (d) sites in Paris.



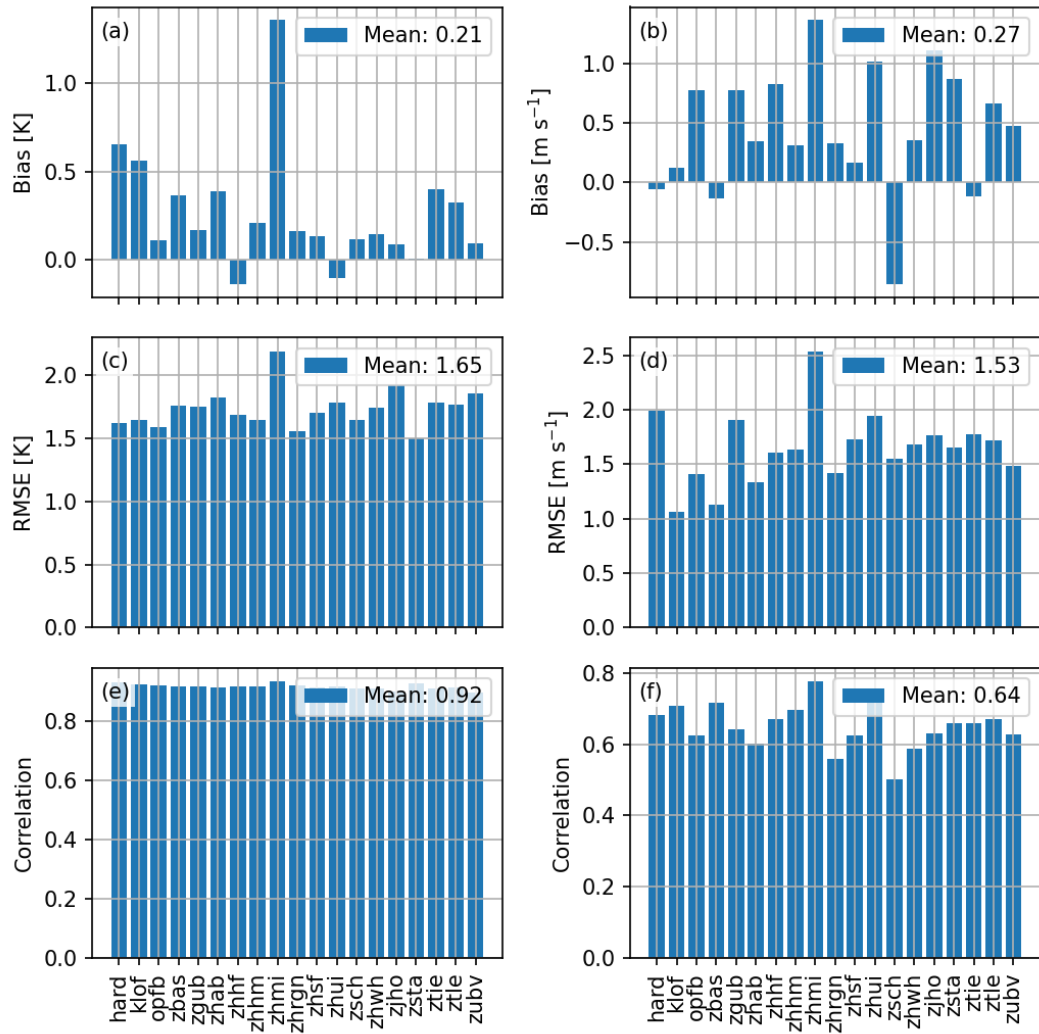

**Figure S7.** Annual statistics of mean modeled versus observed afternoon wind speed and temperature values in Zurich. Panels (a), (c), (e) show annual mean temperature Bias, RMSE, and correlation, correspondingly, while panels (b), (d), (f) show similar statistics for the wind speed.



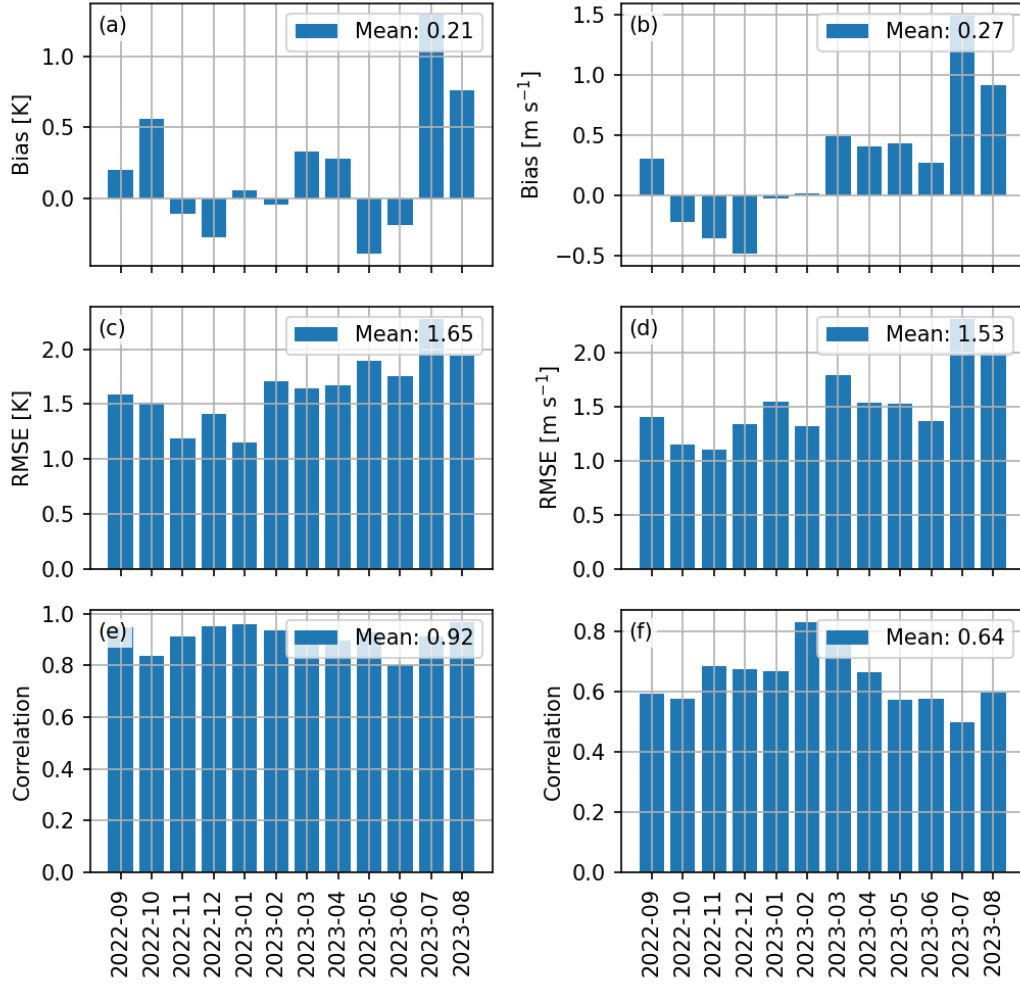

**Figure S8.** Monthly statistics of averaged across all sites modeled and observed afternoon wind speed and temperature values in Zurich. Panels (a), (c), (e) show annual mean temperature Bias, RMSE, and correlation, correspondingly, while panels (b), (d), (f) show similar statistics for the wind speed.

### S1.2 Tables

35 Table S1 lists the meteorological observation sites in Zurich used for temperature and wind speed evaluation, sorted by latitude. Table S2 summarizes the European ICOS sites included in this study. Finally, Table S3 presents the prior and posterior fluxes along with their absolute uncertainties and their reductions for Zurich and Paris across flux categories in summer and winter seasons.

**Table S1.** Sites used for temperature (T) and wind speed (WS) comparison against the model in Zurich, sorted by latitude descending.

| Acronym | Name                          | Longitude | Latitude | Elevation (m) | Inlet height T (m) | Inlet height WS (m) |
|---------|-------------------------------|-----------|----------|---------------|--------------------|---------------------|
| klof    | Kloten Feld                   | 8.5840    | 47.4548  | 440.0         | 4.0                | 4.0                 |
| opfb    | Opfikon Balsberg              | 8.5701    | 47.4388  | 430.0         | 4.0                | 4.0                 |
| zhmi    | Schule Milchbuck              | 8.5378    | 47.3957  | 477.7         | 37.5               | 37.5                |
| zhrgn   | Rosengartenstrasse            | 8.5261    | 47.3952  | 432.7         | 3.3                | 4.9                 |
| zhui    | Universität Zürich Irchel     | 8.5506    | 47.3987  | 491.7         | 30.5               | 30.5                |
| zjho    | Limmattalstrasse Höngg        | 8.4881    | 47.4036  | 441.4         | 13.9               | 13.9                |
| zsta    | Stampfenbachstrasse           | 8.5398    | 47.3867  | 420.8         | 4.5                | 28.5                |
| zhhm    | Hardturmstrasse Förrlibuck    | 8.5153    | 47.3920  | 401.2         | 41.4               | 41.4                |
| zbas    | Badenerstrasse Farbhof        | 8.4803    | 47.3904  | 399.6         | 23.3               | 23.3                |
| hard    | Hardau II                     | 8.5101    | 47.3813  | 409.4         | 110.3              | 110.3               |
| zgub    | Güterbahnhof                  | 8.5176    | 47.3817  | 407.5         | 30.2               | 30.2                |
| ztle    | Letzigraben Telefonzentrale   | 8.5005    | 47.3787  | 411.8         | 25.2               | 25.2                |
| zhsf    | Stauffacherstrasse Werdplatz  | 8.5288    | 47.3724  | 411.4         | 48.5               | 48.5                |
| zsch    | Schimmelstrasse               | 8.5236    | 47.3710  | 413.1         | 3.4                | 5.5                 |
| zhhf    | Kantonales Labor Zürich       | 8.5585    | 47.3713  | 451.8         | 21.4               | 21.4                |
| zubv    | Bankenviertel Bleicherweg     | 8.5380    | 47.3689  | 408.7         | 27.1               | 27.1                |
| zhab    | Albisgüetli                   | 8.5128    | 47.3535  | 469.8         | 23.0               | 23.0                |
| ztie    | Tiefenbrunnen Wildbachstrasse | 8.5588    | 47.3530  | 408.7         | 39.4               | 39.4                |
| zhwh    | Wollishofen                   | 8.5333    | 47.3470  | 407.9         | 42.3               | 42.3                |

**Table S2.** European ICOS sites used in this study. All sites are equipped with high-precision instruments. Elevation refers to height above sea level, and inlet height to height above ground level.

| Acronym | Name                                    | Longitude | Latitude | Elevation (m) | Inlet height (m) |
|---------|-----------------------------------------|-----------|----------|---------------|------------------|
| BIR     | Birkenes                                | 8.2519    | 58.3886  | 294.0         | 75.0             |
| HTM     | Hyltemossa                              | 13.4189   | 56.0976  | 265.0         | 150.0            |
| WES     | Westerland                              | 8.3080    | 54.9231  | 26.0          | 14.0             |
| HEL     | Helgoland                               | 7.8833    | 54.1804  | 153.0         | 110.0            |
| LUT     | Lutjewad                                | 6.3528    | 53.4036  | 61.0          | 60.0             |
| GAT     | Gartow                                  | 11.4429   | 53.0657  | 411.0         | 341.0            |
| STE     | Steinkimmen                             | 8.4588    | 53.0431  | 281.0         | 252.0            |
| WAO     | Weybourne                               | 1.1210    | 52.9500  | 27.0          | 10.0             |
| LIN     | Lindenberg                              | 14.1226   | 52.1663  | 171.0         | 98.0             |
| RGL     | Ridge Hill                              | -2.5399   | 51.9975  | 297.0         | 90.0             |
| CBW     | Cabauw                                  | 4.9264    | 51.9703  | 207.0         | 207.0            |
| TOH     | Torfhaus                                | 10.5350   | 51.8088  | 948.0         | 147.0            |
| JUE     | Jülich                                  | 6.4096    | 50.9102  | 218.0         | 120.0            |
| OXK     | Ochsenkopf                              | 11.8083   | 50.0300  | 1185.0        | 163.0            |
| KRE     | Křešín u Pacova                         | 15.0800   | 49.5720  | 784.0         | 250.0            |
| KIT     | Karlsruhe                               | 8.4249    | 49.0915  | 310.0         | 200.0            |
| SAC     | Saclay                                  | 2.1420    | 48.7227  | 260.0         | 100.0            |
| OPE     | Observatoire pérenne de l'environnement | 5.5036    | 48.5619  | 510.0         | 120.0            |
| TRN     | Trainou                                 | 2.1125    | 47.9647  | 311.0         | 180.0            |
| SSL     | Schauinsland                            | 7.9166    | 47.9167  | 1240.0        | 35.0             |
| HPB     | Hohenpeissenberg                        | 11.0246   | 47.8011  | 1065.0        | 131.0            |
| ZSF     | Zugspitze                               | 10.9796   | 47.4165  | 2669.0        | 3.0              |
| HUN     | Hegyhátsál                              | 16.6522   | 46.9558  | 363.0         | 115.0            |
| JFJ     | Jungfraujoeh                            | 7.9851    | 46.5475  | 3585.7        | 13.9             |
| PRS     | Plateau Rosa                            | 7.7000    | 45.9300  | 3490.0        | 10.0             |
| IPR     | Ispra                                   | 8.6360    | 45.8147  | 310.0         | 100.0            |
| PUY     | Puy de Dôme                             | 2.9658    | 45.7719  | 1475.0        | 10.0             |
| CMN     | Monte Cimone                            | 10.6999   | 44.1936  | 2173.0        | 8.0              |

**Table S3.** Prior and posterior fluxes with absolute uncertainties and their reductions for Zurich and Paris across categories in summer and winter seasons based on the results of this study.

| City   | Season | Category      | Prior flux<br>$\pm$ uncertainty (kt/yr) | Posterior flux<br>$\pm$ uncertainty (kt/yr) | Absolute uncertainty<br>reduction (kt/yr) | Uncertainty reduction<br>(%) |
|--------|--------|---------------|-----------------------------------------|---------------------------------------------|-------------------------------------------|------------------------------|
| Zurich | Summer | Total         | $998.8 \pm 242.8$                       | $735.9 \pm 156.8$                           | 86.0                                      | 35.4                         |
|        | Winter | Total         | $2018.3 \pm 431.7$                      | $1021.5 \pm 47.2$                           | 384.5                                     | 89.1                         |
|        | Summer | Anthropogenic | $961.9 \pm 205.3$                       | $1042.7 \pm 112.7$                          | 92.6                                      | 45.1                         |
|        | Winter | Anthropogenic | $1909.6 \pm 430.9$                      | $928.5 \pm 42.3$                            | 388.7                                     | 90.2                         |
|        | Summer | NEE           | $36.9 \pm 129.5$                        | $-306.8 \pm 109.0$                          | 20.5                                      | 15.9                         |
|        | Winter | NEE           | $108.6 \pm 26.2$                        | $93.0 \pm 21.0$                             | 5.2                                       | 19.8                         |
|        | Summer | RE            | $565.8 \pm 88.8$                        | $438.9 \pm 59.6$                            | 29.2                                      | 32.8                         |
|        | Winter | RE            | $148.2 \pm 25.5$                        | $130.5 \pm 20.3$                            | 5.2                                       | 20.4                         |
|        | Summer | GPP           | $528.8 \pm 94.3$                        | $745.7 \pm 91.2$                            | 3.1                                       | 3.3                          |
|        | Winter | GPP           | $39.5 \pm 5.8$                          | $37.5 \pm 5.3$                              | 0.5                                       | 8.3                          |
| Paris  | Summer | Total         | $2254.7 \pm 539.9$                      | $2368.4 \pm 136.3$                          | 403.6                                     | 74.8                         |
|        | Winter | Total         | $5067.3 \pm 1253.7$                     | $4924.4 \pm 272.7$                          | 981.1                                     | 78.3                         |
|        | Summer | Anthropogenic | $2285.6 \pm 538.7$                      | $2385.4 \pm 131.6$                          | 407.1                                     | 75.6                         |
|        | Winter | Anthropogenic | $5033.1 \pm 1253.7$                     | $4894.3 \pm 272.5$                          | 981.2                                     | 78.3                         |
|        | Summer | NEE           | $-30.9 \pm 35.4$                        | $-17.0 \pm 35.6$                            | -0.2                                      | -0.5                         |
|        | Winter | NEE           | $34.2 \pm 9.7$                          | $30.0 \pm 9.2$                              | 0.5                                       | 5.1                          |
|        | Summer | RE            | $133.4 \pm 21.5$                        | $148.8 \pm 21.7$                            | -0.1                                      | -0.6                         |
|        | Winter | RE            | $51.7 \pm 9.1$                          | $48.9 \pm 8.5$                              | 0.6                                       | 6.7                          |
|        | Summer | GPP           | $164.3 \pm 28.1$                        | $165.8 \pm 28.2$                            | -0.1                                      | -0.4                         |
|        | Winter | GPP           | $17.4 \pm 3.4$                          | $18.8 \pm 3.6$                              | -0.2                                      | -6.0                         |

## References

- 40 Stagakis, S., Brunner, D., Li, J., Backman, L., Karvonen, A., Constantin, L., Järvi, L., Havu, M., Chen, J., Emberger, S., and Kulmala, L.: Intercomparison of biogenic CO<sub>2</sub> flux models in four urban parks in the city of Zurich, *Biogeosciences*, 22, 2133–2161, <https://doi.org/10.5194/bg-22-2133-2025>, 2025.
